# Supplementary material
Source: Research Square preprint supplement (doi:10.21203/rs.3.rs-9355144/v1)
Supplement: Supplementary file 1 [file 644f98e3a0dfaeb8e3cfdaec.docx]

Supplemental Table 1. Primers for qRT-PCR detection.

| Gene | F（5’-3’） | R（5’-3’） |
| --- | --- | --- |
| *IL-1β* | TGCCACCTTTTGACAGTGATG | TGATGTGCTGCTGCGAGATT |
| *IL-6* | CTGCAAGAGACTTCCATCCAG | AGTGGTATAGACAGGTCTGTTGG |
| *TNFα* | CCACCACGCTCTTCTGTCTAC | AGGGTCTGGGCCATAGAACT |
| *Actin* | CGTGAAAAGATGACCCAGATCA | CACAGCCTGGATGGCTACGT |
